# Supplementary material
Source: HighWire-hosted journal article supplement (https://erj.ersjournals.com/content/61/1/2202261)
Supplement: inline-supplementary-material-1 [file inline-supplementary-material-1.pdf]

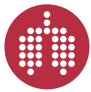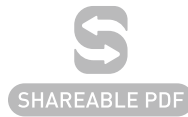

# Reply to: Risk factors for disease progression in fibrotic hypersensitivity pneumonitis

M. Malik Farooqi <sup>1</sup>, Nathan Hambly<sup>1</sup>, Christopher J. Ryerson<sup>2,3</sup> and Martin Kolb <sup>1,4</sup>

<sup>1</sup>Department of Medicine, McMaster University, Hamilton, ON, Canada. <sup>2</sup>Centre for Heart Lung Innovation, St. Paul's Hospital, Vancouver, BC, Canada. <sup>3</sup>Department of Medicine, University of British Columbia, Vancouver, BC, Canada. <sup>4</sup>McMaster Immunology Research Centre, M.G. DeGroot Institute for Infectious Disease Research, Department of Pathology and Molecular Medicine, McMaster University, Hamilton, ON, Canada.

Corresponding author: Martin Kolb ([kolbm@mcmaster.ca](mailto:kolbm@mcmaster.ca))

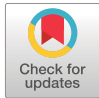

Shareable abstract (@ERSpublications)

**In a Canadian population with fibrotic hypersensitivity pneumonitis, only the presence of an identified antigen is associated with lower risk of progressive fibrosing interstitial lung disease**  
<https://bit.ly/3FACsqB>

**Cite this article as:** Farooqi MM, Hambly N, Ryerson CJ, *et al.* Reply to: Risk factors for disease progression in fibrotic hypersensitivity pneumonitis. *Eur Respir J* 2023; 61: 2202261 [DOI: 10.1183/13993003.02261-2022].

This single-page version can be shared freely online.

Copyright ©The authors 2023.  
For reproduction rights and  
permissions contact  
[permissions@ersnet.org](mailto:permissions@ersnet.org)

Received: 9 Dec 2022  
Accepted: 12 Dec 2022

*Reply to Hajime Fujimoto and co-workers:*

We thank Hajime Fujimoto and co-workers for providing commentary on our article describing the prevalence and characteristics of progressive fibrosing interstitial lung disease (PF-ILD) [1]. We agree that highlighting individual predictors of progression by specific ILD subtype would help further refine risk stratification and guide management decisions.
